# Supplementary material for: Diagnostic value and mechanism of plasma S100A1 protein in acute ischemic stroke: a prospective and observational study
Source: PeerJ. 2023 Jan 10;11:e14440. doi: 10.7717/peerj.14440 (PMC9838205; doi:10.7717/peerj.14440)
Supplement: Supplemental Information 1 [file peerj-11-14440-s001.xlsx]

## Sheet: AIS, TIA, and PE 
Serial number	Age	Gender (Male and Female)	Group (AIS/TIA/PE)	Body weight (kg)	Height(cm)	BMI(kg/m2)	Smoking (Yes/No)	Drinking alcohol (Yes/No)	Hypertension	Diabetes	Hyperlipidemia	Atrial fibrillation	Coronary heart disease	Admission systolic blood pressure	Admission diastolic blood pressure	Red blood cells（10^12/L）	hematocrit	Leukocytes（10^9/L）	Neutrophils（10^9/L）	Lymphocytes	Monocytes	RDW	PLT（10^9/L）	Creatinine(umoL/L)	ALT（u/L）	AST(u/l)	Blood glucose（mmol/L）	Homocysteine（umol/L）	TC, mmol/L	TG, mmol/L	LDL-C, mmol/L	HDL-C, mmol/L	NF-KB p65（ng/ml）	IL-6（pg/ml）	S100A1（pg/ml）
1	68	Female	AIS	75	160	29.3	No	No	Yes	No	No	No	No	155	73	3.82	36.6	5.73	3.9	1.45	0.31	13.2	102	50.7	29	25	4.74	12	4.07	1.55	2.22	1.35	3.23	13.53	272.27
2	56	Male	AIS	58	165	21.3	Yes	No	Yes	No	No	No	No	180	110	4.4	41.3	5.89	4.19	1.16	0.45	13.1	211	76.9	32	25	4.08	4	4.84	0.95	3.32	1.13	3.87	13.75	208.38
3	57	Male	AIS	79	168	28	No	No	Yes	No	No	No	No	126	79	5.07	45.4	7.22	5.49	1.41	0.27	11.7	189	50.1	26	21	6.37	3	3.66	1.9	2.49	0.73	4.5	12.45	206.87
4	73	Male	AIS	58	160	22.7	No	No	Yes	No	No	No	No	166	57	3.87	36.9	4.82	3.28	1.14	0.36	13.5	67	76.3	47	34	7.18	7	3.72	1.12	2.44	1.01	4.25	12.47	205.94
5	66	Female	AIS	65	160	25.4	No	No	No	No	No	No	No	176	106	3.72	36.2	6.77	5.72	0.75	0.27	11.6	162	49.2	32	27	6.04	10	3.52	1.98	1.93	0.77	4.67	13.26	227.81
6	72	Male	AIS	60	168	21.3	Yes	No	No	No	No	No	No	176	97	5.09	43.6	6.18	3.97	1.62	0.46	12.4	292	54.2	25	23	3.99	23	4.21	2.37	2.91	0.61	3.82	11.94	197.91
7	66	Female	AIS	41	145	19.5	No	No	Yes	Yes	No	No	No	187	86	4.58	41.3	6.48	3.97	1.92	0.34	12.2	218	57.3	37	34	7.7	13	5.02	1.66	3.63	0.96	2.84	12.19	187.56
8	55	Male	AIS	70	165	25.7	No	No	Yes	No	No	No	No	172	107	5.2	45	5.29	3.22	1.61	0.39	11.8	153	47.4	46	29	10.37	2	3.6	2.48	1.17	0.54	3.05	11.44	205.12
9	60	Female	AIS	67	159	26.5	No	No	No	No	No	No	No	174	84	4.79	43.9	7.83	5.19	2.08	0.42	11.8	147	55.3	27	29	7.14	2	3.17	1.28	1.91	0.84	4.53	11.68	204.66
10	74	Male	AIS	65	170	22.5	Yes	No	No	No	No	No	No	156	96	4.34	41.5	5.27	4.18	0.71	0.35	12.9	100	80.5	29	24	5.66	9	4.2	2.07	2.37	1.18	3.15	13.96	180.92
11	57	Male	AIS	58	169	20.3	No	No	Yes	No	No	No	No	190	100	4.57	39.8	4.17	3.1	0.79	0.21	12.5	115	50.6	24	23	5.05	10	3.43	1.57	2.03	0.87	4.45	12.6	219.32
12	78	Male	AIS	63	165	23.1	No	No	No	No	No	No	No	153	97	4.53	40.4	6.09	4.26	1.16	0.58	13.3	171	45.2	28	27	4.48	14	3.71	1.16	2.09	1.15	3.19	11.95	273.36
13	56	Female	AIS	55	165	20.2	No	No	Yes	Yes	No	No	No	163	86	4.17	36.5	7.51	4.55	2.55	0.35	12.5	212	35.4	21	18	3.66	11	5.16	1.12	0.89	0.63	2.89	11.73	239.62
14	54	Male	AIS	75	173	24.1	No	No	Yes	Yes	No	No	No	140	100	5.13	42.7	5.28	4.14	0.78	0.34	11.6	176	50	7	11	11.01	4	5.87	0.87	4.13	1.39	4.36	12.93	270.45
15	77	Male	AIS	58	174	19.2	Yes	No	No	No	No	No	No	115	69	3.9	38.3	10.98	9.22	1.09	0.59	13.3	97	83.4	22	26	3.99	11	3.83	0.95	2.22	1.18	3.58	12.56	266.55
16	69	Male	AIS	60	162	22.9	Yes	Yes	Yes	No	No	No	No	103	63	4.77	42.2	9.57	6.49	2.28	0.61	13.1	168	46.3	48	46	7.21	10	4.41	2.75	2.25	0.95	3.01	11.04	190.01
17	68	Male	AIS	50	165	18.4	Yes	Yes	Yes	No	No	No	No	171	112	5.1	44.7	9.58	6.41	2.11	0.87	13.3	205	65	11	17	5.19	11	5.1	1.62	3.68	1.02	4.29	10.33	215.59
18	60	Male	AIS	60	160	23.4	No	No	No	No	Yes	No	No	153	85	4.9	43.4	5.48	3.58	1.34	0.48	12.2	220	53.7	31	24	4.5	6	2.83	0.86	1.53	0.93	3.62	14.34	200.7
19	51	Male	AIS	72	170	24.9	Yes	No	Yes	No	No	No	No	145	89	5.59	45.1	9.35	5.43	2.7	0.75	12.9	251	49.6	62	31	5.27	5	4.76	1.65	3.36	0.86	3.02	11.24	189.01
20	57	Male	AIS	67	165	24.6	Yes	Yes	No	No	No	No	No	123	70	5.04	46.6	4.55	2.37	1.52	0.42	12.4	169	61.4	29	30	4.29	6	4.33	4.23	1.84	0.89	3.32	11.56	230.11
21	75	Female	AIS	55	158	22	No	No	Yes	Yes	No	No	No	176	95	4.29	38.9	8.8	5.22	2.64	0.79	12.9	263	92.5	10	19	6.75	17	3.46	3.73	1.79	0.72	3.75	11.64	230.22
22	65	Male	AIS	76	160	29.7	Yes	No	Yes	Yes	No	No	No	146	101	4.6	41.2	6.66	3.25	2.92	0.36	13.5	135	84	27	19	8.41	22	3.5	2.22	2.09	0.82	3.53	11.28	260.73
23	87	Female	AIS	60	155	25	No	No	No	No	No	No	No	183	84	4.37	38.9	5.4	3.79	1.23	0.29	13.2	233	75	21	26	6.34	19	3.44	1.51	2.14	0.89	3.25	11.14	252.3
24	72	Male	AIS	70	168	24.8	Yes	No	Yes	No	No	No	No	160	91	5.29	46.9	4.99	3.21	1.23	0.48	11.9	179	93.6	25	30	4.26	15	4.55	2.54	2.89	0.8	4.33	10.87	208.07
25	66	Male	AIS	65	165	23.9	No	No	Yes	No	No	No	No	172	87	4.37	42.4	5.16	2.97	1.48	0.36	12.4	169	93	12	19	4.3	20	3.15	0.98	1.85	1.01	3.88	14.78	241.66
26	49	Male	AIS	63	169	22.1	Yes	No	No	No	No	No	No	110	70	4.19	41.4	9.14	5.36	3.01	0.51	11.4	203	74	19	20	5.57	17	4.18	3.88	1.91	0.66	3.92	13.59	217.74
27	69	Female	AIS	65	165	23.9	No	No	Yes	No	No	No	No	159	59	3.88	34.3	4.28	2.99	1	0.26	13.1	116	55.1	23	37	5.25	13	4.65	1.66	3.12	1.02	3.98	14.69	198.86
28	83	Male	AIS	80	175	26.1	Yes	No	No	No	No	No	No	140	69	4.12	37.6	7.25	4.47	1.89	0.65	12.4	222	70.8	14	17	5.55	14	3.79	1.97	2.43	0.73	4.55	12.39	184.78
29	81	Female	AIS	60	160	23.4	No	No	No	Yes	No	No	Yes	148	58	3.78	33.8	5.09	2.98	1.42	0.39	14.4	138	60.4	8	19	5.77	6	4.53	3.33	2.31	0.96	2.98	13.03	194.62
30	66	Female	AIS	66	153	28.2	No	No	Yes	Yes	No	No	No	130	80	4.14	37.2	8.25	5.83	1.75	0.42	12.4	254	63	9	17	6.81	4	4.09	2.2	2.75	0.65	3.23	11.84	181.12
31	57	Female	AIS	60	165	22	No	No	Yes	Yes	No	No	No	160	81	4.26	36.3	5.36	3.38	1.64	0.23	12.6	218	41.4	20	16	7.82	12	4.2	1.28	1.8	0.8	3.05	13.28	184.67
32	72	Male	AIS	72	170	24.9	No	No	Yes	Yes	No	No	No	161	87	4.14	38.4	4.4	2.16	1.64	0.5	12.8	176	70.7	15	22	5	11	3.84	1.55	2.45	0.93	4.74	14.3	238.34
33	63	Female	AIS	75	160	29.3	No	No	Yes	No	No	No	No	150	90	4.99	45.4	7.93	6.73	0.79	0.35	12.7	218	39.8	27	22	5.55	9	4.2	1.19	2.83	1.02	3.6	14.84	209.5
34	80	Male	AIS	75	172	25.4	Yes	Yes	Yes	No	No	No	No	107	60	4.67	44.9	7.88	4.15	2.88	0.6	14.4	278	101.6	23	28	5.4	29	4.12	1.48	2.52	1.13	2.98	10.95	274.91
35	15	Male	AIS	85	178	26.8	No	No	No	No	No	No	No	109	54	5	40.1	4.95	3.39	0.55	0.67	13.2	253	69.4	49	27	4.9	38	2.8	0.73	1.62	0.99	3.84	13.68	275.71
36	66	Female	AIS	62	159	24.5	No	No	Yes	Yes	No	No	No	131	76	3.71	35.3	5.78	3.35	1.9	0.39	12.3	180	63.8	17	22	7.22	15	3.65	1.13	2.12	1.17	4.55	12.78	192.33
37	52	Male	AIS	73	175	23.8	Yes	Yes	Yes	No	No	No	No	177	102	4.92	44.8	8.78	4.97	2.87	0.73	13.4	287	69	14	16	6.25	38	4.48	1.85	3.01	0.79	4.68	12.32	197.2
38	67	Male	AIS	63	171	21.5	Yes	No	No	No	No	No	No	154	75	4.56	40	5.88	4.45	1.02	0.23	11.9	171	64.7	14	23	4.65	16	4.14	1.35	2.56	0.97	3.86	14.36	208.47
39	63	Male	AIS	65	170	22.5	Yes	Yes	No	No	No	No	No	140	86	4.5	41.8	5.6	3.3	1.61	0.27	12.7	190	47.3	17	24	5.04	4	4.42	2.03	2.65	1.22	4	14.13	233.88
40	69	Male	AIS	75	165	27.5	No	No	Yes	No	No	No	No	140	90	5.05	43	6.21	3.97	1.48	0.63	12.2	191	78.3	25	33	4.76	13	4.62	2.49	2.94	0.65	3.33	13.39	244.75
41	81	Male	AIS	69	175	22.5	Yes	No	No	Yes	No	No	Yes	176	93	4.83	44.5	6.94	4.09	2.02	0.72	12.8	201	70	14	19	14.2	14	2.77	0.78	1.24	1.27	3.53	13.31	217.91
42	70	Female	AIS	65	158	26	No	No	Yes	No	No	No	No	167	69	4.4	37.3	8.4	7.13	0.97	0.26	13	340	45.8	52	44	6.22	9	6.08	1.6	4.43	1.13	4.04	12.64	258.48
43	65	Female	AIS	67	158	26.8	No	No	No	No	No	No	No	153	99	4.46	38.6	4.41	2.04	1.91	0.36	12.1	128	59	29	29	7.1	2	4.35	0.85	2.75	1.37	3.24	10.84	222.38
44	52	Female	AIS	63	165	23.1	No	No	Yes	Yes	No	No	No	144	76	3.67	32.1	8.57	5.76	2.32	0.4	11.7	165	63.2	44	25	5.91	3	4.49	1.51	3.03	0.79	3.31	14.66	219.4
45	64	Male	AIS	75	170	26	Yes	Yes	Yes	No	No	No	No	137	87	5.62	48.4	14.62	3.27	1.25	0.75	13.1	161	81.7	20	30	3.96	16	4.14	3.49	2.16	0.66	3.52	14.05	247.73
46	63	Male	AIS	65	170	22.5	Yes	Yes	Yes	Yes	No	No	No	135	88	4.68	44.6	5.01	3.04	1.38	0.35	12.4	142	55.9	18	26	6.19	11	4.03	1.63	2.61	1.01	3.59	11.05	190.21
47	85	Female	AIS	40	160	15.6	No	No	Yes	No	No	No	No	160	70	3.9	35.7	5.61	2.64	1.42	0.38	13.1	268	59	29	27	3.94	4	4.85	2.21	3.08	0.89	4.12	12.87	235.65
48	47	Female	AIS	70	162	26.7	No	No	No	Yes	No	No	No	132	91	6.94	4.66	42.7	3.17	1.01	0.31	12.8	105	46.2	17	17	16	4	4.87	2.78	3.16	0.81	2.88	13.55	190.79
49	75	Male	AIS	60	170	20.8	No	No	Yes	Yes	No	No	Yes	136	82	4.35	33.3	6.08	3.53	1.64	0.7	16.1	245	59.6	20	21	8.89	4	4.85	1.21	3.08	0.89	3.13	13.43	186.61
50	65	Male	AIS	80	170	27.7	Yes	No	Yes	No	No	Yes	No	160	82	5.45	45.5	5.89	3.95	1.44	0.41	12.7	188	76.2	58	34	4.95	5	3.11	0.9	1.86	1.02	4.7	14.51	274.45
51	86	Male	AIS	90	178	28.4	No	No	Yes	No	No	Yes	No	130	66	4.56	41.1	7.19	4.91	1.5	0.65	13.2	210	98.7	30	20	7.6	8	3.21	0.63	2.14	0.69	4.42	13.05	235.77
52	88	Male	AIS	75	170	26	No	No	Yes	Yes	No	Yes	Yes	130	55	4.08	37.3	6.04	4.08	1.26	0.63	13.3	173	88.3	38	27	6.48	7	2.36	1.1	1.1	0.87	4.86	15.3	286.41
53	64	Female	AIS	80	165	29.4	No	No	Yes	Yes	No	No	No	137	78	4.3	39.4	4.8	3.33	1.16	0.26	12.9	193	42	72	60	9.78	7	4.91	1.25	2.39	1.01	4.91	13.49	253.51
54	65	Male	AIS	55	160	21.5	Yes	No	No	No	No	No	No	154	93	5.46	47.1	9.52	6.71	1.74	0.75	13.1	110	52.7	35	30	5.83	10	3.56	1.84	2.07	0.9	4.7	15.31	193.94
55	72	Female	AIS	64	158	25.6	No	No	Yes	No	No	Yes	Yes	157	84	3.58	34.9	9.05	4.33	1.91	0.39	14.4	188	67.1	66	64	7.2	10	3.96	0.75	2.38	1.38	4.4	14.77	235.66
56	46	Male	AIS	87	172	29.4	No	No	Yes	No	No	No	No	152	87	5.44	47.7	8.44	5.62	1.93	0.72	13.4	189	91.7	36	24	4.92	9	4.42	2.22	2.71	0.96	4.71	12.61	182.03
57	51	Male	AIS	80	178	25.2	Yes	No	Yes	No	No	No	No	145	80	5.66	48.8	8.28	6.32	1.05	0.34	12.1	267	67.3	33	24	4.28	17	3.51	0.89	2.25	0.95	3.58	14.78	208.21
58	47	Male	AIS	75	172	25.4	Yes	Yes	Yes	No	Yes	No	No	158	111	5.3	43.7	8.17	6.03	1.31	0.65	12.7	256	61.9	63	35	5.7	9	5.25	2.5	3.61	1.03	4.86	13.49	223.91
59	73	Male	AIS	58	164	21.6	Yes	No	Yes	No	No	No	No	135	90	5.06	43.5	13.61	10.71	2.38	0.49	12.1	242	77.5	38	45	4.56	31	4.12	1.69	2.53	0.78	3.67	15.45	281.44
60	67	Male	AIS	72	160	28.125	Yes	Yes	Yes	No	No	Yes	No	134	87	69.4	46.6	42.7	3.17	1.01	0.31	12.8	105	46.2	17	17	16	13	4.87	2.78	3.16	0.81	3.93	11.49	197.91
61	72	Female	AIS	65	156	26.7094	No	No	Yes	No	No	No	No	145	94	5.45	45.5	5.89	3.95	1.44	0.41	12.7	188	76.2	58	34	4.95	5	3.11	0.9	1.86	1.02	3.95	13	275.16
62	72	Female	AIS	60	154	25.2994	No	No	Yes	No	No	Yes	No	132	84	6.94	46.6	42.7	3.17	2.01	0.31	12.8	105	46.2	17	17	16	12	4.87	2.78	3.16	0.81	3.52	12.01	231.21
63	61	Male	AIS	77	169	26.9598	No	No	No	No	No	Yes	No	133	85	4.08	37.3	6.04	4.08	1.26	0.63	13.3	173	88.3	38	27	6.48	7	2.36	1.1	1.1	0.87	3.05	11.92	241.01
64	61	Female	AIS	66	158	26.4	No	No	Yes	No	No	No	No	126	80	4.42	39.3	6.16	4.28	1.3	0.45	12.8	240	67	24	29	4.52	6	3.9	1.7	2.34	0.97	4.49	10.61	209.19
65	69	Female	AIS	64	163	24.0882	No	No	No	No	No	Yes	No	145	91	3.58	34.9	9.05	4.33	1.91	0.39	14.4	188	67.1	66	64	7.2	9	3.96	0.75	2.38	1.38	4.67	11.21	265.47
66	70	Female	AIS	61	163	22.9591	No	No	No	No	No	Yes	No	156	92	4.3	39.4	4.8	3.33	1.16	0.26	12.9	193	42	72	60	9.78	7	4.91	3.25	2.39	1.01	4.68	12.79	245.95
67	72	Female	AIS	66	164	24.539	No	No	No	No	Yes	No	No	129	78	4.18	36.9	5.55	3.3	1.6	0.38	12.3	139	66.5	24	25	5.4	10	4.42	1.42	2.87	1.03	4.35	12.56	202.41
68	67	Male	AIS	77	170	26.6436	Yes	No	No	No	No	No	No	134	75	3.59	34.3	4.58	2.33	1.77	0.29	18.7	90	52.7	21	27	6.41	2	3.29	1.04	1.46	1.59	3.89	12.08	181.63
69	64	Female	AIS	62	161	23.9188	No	No	No	No	No	No	No	127	79	4.18	36.9	5.55	3.3	1.6	0.38	12.3	139	66.5	24	25	5.4	10	4.42	1.42	2.87	1.03	3.23	11.84	181.12
70	76	Female	AIS	70	155	29.1363	No	No	No	No	No	Yes	Yes	154	99	3.59	34.3	4.58	2.33	1.77	0.29	18.7	90	52.7	21	27	6.42	2	3.29	1.04	1.46	1.59	3.56	13.78	230.9
71	69	Male	AIS	65	168	23.03	No	No	No	No	No	Yes	No	155	76	4.18	36.9	5.55	3.3	1.6	0.38	12.3	139	66.5	24	25	5.4	10	4.42	1.42	2.87	1.03	5.01	11.24	200.63
72	81	Female	AIS	75	160	29.2969	No	No	Yes	Yes	No	Yes	No	126	81	5	46.7	5.34	3.94	0.9	0.39	12.9	182	71.6	16	24	8.21	6	4.09	1.63	2.69	0.83	2.93	11.01	121.1
73	63	Female	AIS	55	150	24.4444	No	No	No	No	No	Yes	No	167	110	4.23	36.7	8.67	6.97	1.13	0.33	12	120	48.1	38	40	5.27	11	6.84	1.83	4.51	1.57	3.92	15.31	260.37
74	53	Male	AIS	88	170	30.4498	No	No	Yes	No	Yes	No	Yes	151	86	5.34	52.8	6.46	4.49	1.46	0.4	12.4	119	99	16	16	4.05	10	2.43	1.38	1.1	0.91	3.21	10.09	123.44
75	81	Male	AIS	60	172	20.2812	No	No	Yes	Yes	No	No	No	165	94	4.13	37.9	3.91	2.55	0.9	0.38	11	77	85	30	34	5.22	9	2.89	0.87	1.69	0.99	3.34	12.16	262.6
76	69	Female	AIS	65	160	25.3906	No	No	Yes	No	No	Yes	No	154	100	4.48	41.5	6.85	5.9	1.42	0.21	11.8	276	56.7	20	26	6.57	14	6.35	1.54	4.33	1.36	4.46	11.89	268.1
77	66	Male	AIS	70	165	25.7	Yes	No	Yes	No	Yes	No	No	159	87	4.49	43	3.83	2.41	1.02	1.02	12.3	150	67.4	44	32	5.1	8	3.51	1.83	2.06	0.83	4.05	14.69	230.16
78	66	Male	AIS	41	148	18.718	No	No	No	No	No	No	No	145	76	3.59	34	6.98	5	1.43	0.53	13.2	112	47.6	18	24	5.8	16	5.05	1.06	3.34	1.16	4.12	11.7	218.89
79	77	Male	AIS	60	170	20.7612	Yes	Yes	No	No	No	No	No	146	60	3.27	34.2	5.25	3.87	0.92	0.41	13.4	67	46	34	26	5.11	22	2.64	0.85	1.35	0.94	4.79	12.74	237.2
80	64	Female	AIS	70	160	27.3438	No	No	No	No	No	No	No	114	74	4.39	41.1	6.04	3.67	1.75	0.45	12.9	133	45.7	34	20	5.7	1	4.14	3.06	2.37	0.82	3.44	11.76	203.03
81	72	Female	AIS	65	158	26.0375	No	No	Yes	Yes	No	No	No	150	72	4.29	40	6.66	4.17	2.08	2.08	10.9	221	67	41	16	5.6	12	4.23	2.1	2.2	1.2	5.32	16.34	220.14
82	79	Female	AIS	53	160	20.7031	No	No	No	Yes	No	No	No	165	88	4.2	37.8	6.18	3.58	2.14	0.41	13.7	153	51.5	42	37	4.53	7	2.97	0.7	1.49	1.03	4.21	13.93	204.24
83	56	Female	AIS	60	160	23.4375	No	No	Yes	No	No	No	No	156	97	4.53	39.8	13.92	12.47	0.93	0.49	11.8	248	45.4	39	35	4.46	18	4.43	1.34	2.49	1.56	3.59	13.87	279.14
84	72	Male	AIS	65	170	22.4913	Yes	Yes	No	Yes	No	No	No	135	72	2.88	27.2	5.34	2.5	1.49	0.61	15.1	193	66	3	13	6.44	8	3.35	1.01	2.13	0.81	5.17	14.2	235.77
85	58	Male	AIS	70	174	23.1206	Yes	Yes	Yes	No	No	No	Yes	134	92	4.71	42.5	4.01	2.33	1.33	0.28	12.9	147	78	40	27	6.17	32	2.83	1.8	1.28	1.04	3.54	15.8	226.32
86	83	Female	AIS	65	158	26.0375	No	No	Yes	Yes	No	No	Yes	201	88	3.92	35.4	6.76	5.16	1.19	0.28	10.3	287	93.4	28	20	6.47	3	5.99	2.62	3.96	1.01	4.03	13.02	251.79
87	73	Male	AIS	65	169	22.7583	No	No	Yes	No	No	No	No	145	63	4.45	40.2	6.81	5.13	1.18	0.44	12.1	234	74	25	22	5.7	14	4.6	2.35	2.88	1.01	4.07	16.16	279.54
88	78	Male	AIS	52	163	19.5717	No	No	Yes	Yes	No	No	Yes	152	78	4.2	41	5.42	4.36	0.65	0.35	12.4	134	58.5	29	29	5.2	9	2.6	0.47	1.07	1.49	5.27	12.14	302.49
89	58	Female	AIS	60	160	23.4375	No	No	Yes	No	No	No	No	164	98	4.65	42.9	5.96	3.18	2.23	0.45	11.4	283	59.9	18	27	4.37	9	4.68	0.87	3.03	1.4	3.7	15.43	256.65
90	81	Female	AIS	53	155	22.0604	No	No	Yes	No	No	No	Yes	162	82	3.52	32.1	7.81	5.49	1.73	1.73	10.3	160	79.5	24	31	5.27	5	4.38	1.5	2.89	1.03	3.6	15.89	209.83
91	71	Male	AIS	65	165	23.8751	No	No	No	Yes	No	No	No	144	66	3.56	33.4	6.7	3.56	2.38	0.43	12.9	175	52.8	20	19	3.65	5	3.59	1.81	2.35	0.8	5.21	15.8	245.61
92	80	Male	AIS	70	172	23.6614	No	Yes	Yes	No	No	Yes	No	170	85	4.24	39	4.36	3.24	0.67	0.4	12.9	167	73.3	37	34	4.72	12	2.38	0.68	1.11	1.06	4.59	12.79	282.72
93	82	Male	AIS	60	175	19.5918	No	No	Yes	No	No	No	No	168	67	5.23	46.3	5.59	4.46	0.71	0.71	19.8	139	60.2	35	22	4.87	24	4.31	1.35	3.02	0.87	4.64	15.6	289.35
94	40	Male	AIS	89	172	30.0838	Yes	No	Yes	No	No	No	No	117	77	4.8	41.7	6.46	3.1	2.6	0.6	14.3	202	89.3	33	25	4.98	17	5	2.36	3.42	0.64	3.8	15.92	267.54
95	66	Female	AIS	45	155	18.7305	No	No	Yes	Yes	No	No	No	169	69	2.5	21.9	8.27	5.37	1.9	0.67	13.3	243	52.4	44	45	4.77	3	4.23	1.38	2.98	0.77	4.85	12.21	200.12
96	60	Male	AIS	50	163	18.8189	Yes	Yes	Yes	Yes	No	No	No	148	82	4.97	44.7	8.05	5.22	1.88	0.58	12.1	252	54.1	70	45	5.74	10	4.68	0.86	3.36	0.86	3.94	14.99	263.47
97	62	Male	AIS	75	174	24.7721	No	Yes	Yes	No	No	No	No	152	98	4.93	47.9	6.01	3.61	1.46	0.87	12.9	117	87	38	40	3.74	9	2.88	0.91	1.42	1.21	3.94	15.58	286.39
98	52	Male	AIS	70	165	25.7117	Yes	Yes	Yes	No	No	No	No	141	93	4.75	43.4	9.67	6.99	1.94	0.47	12.6	244	78	35	32	5.06	6	4.52	2.03	2.36	1.06	4.36	15.98	233.51
99	73	Female	AIS	55	162	20.9572	No	No	No	No	Yes	No	No	165	78	4.06	36.7	6.82	4.51	1.77	0.38	13.2	182	74.4	23	22	4.25	7	5.76	2.68	3.39	1.42	4.82	13.39	267.13
100	79	Male	AIS	55	170	19.0311	Yes	Yes	Yes	No	No	No	No	155	77	4.86	45.6	5.77	4.04	1.27	0.4	15.8	218	87.4	22	24	3.97	14	3.82	1.22	2.13	1.3	4.37	13.91	207.86
101	71	Male	AIS	64	170	22.1453	Yes	Yes	Yes	No	No	No	No	140	80	4.34	41.4	4.38	3.24	0.76	0.345	12.4	149	65.9	24	25	4.76	5	3.09	1.12	1.67	1.16	4.54	15.07	283.6
102	86	Male	AIS	65	160	25.3906	Yes	Yes	Yes	No	No	No	No	179	93	4.7	42.9	5.53	3.64	1.33	0.44	12.3	166	99.8	28	34	8.13	6	3.68	3.29	2.3	0.59	4.65	14.71	202.85
103	71	Female	AIS	50	157	20.2848	No	No	No	No	No	No	No	182	89	4.57	40.1	8.01	7.01	0.79	0.19	12.7	164	58.3	30	29	7.18	13	5.32	0.92	3.06	1.88	4.78	13.57	266.49
104	75	Male	AIS	75	170	25.9516	Yes	Yes	Yes	Yes	No	No	No	155	89	4.86	42	5.63	4.09	1.04	0.35	10.4	199	75	105	84	10.63	9	4.27	2.9	2.59	0.95	3.39	12.1	302.56
105	51	Male	AIS	80	175	26.1224	Yes	Yes	Yes	No	No	No	No	161	100	4.89	45.3	7.94	6.33	1.18	0.41	13	175	53.6	27	32	5.36	7	5.9	1.23	3.96	1.51	5.13	15.92	303.78
106	72	Female	AIS	45	155	18.7305	No	No	Yes	Yes	No	No	No	158	81	4.02	35.1	6.46	5.33	0.62	0.4	12.2	123	39.9	19	41	12.22	4	4.37	1.03	2.56	1.56	3.76	15.78	212.74
107	59	Male	AIS	70	172	23.6614	No	No	Yes	No	No	No	No	148	78	3.78	32.4	17.3	10.47	5.55	0.97	14.6	317	69	8	9	4.17	12	4.87	1.92	2.94	1.45	3.73	15.84	225.42
108	58	Male	AIS	85	178	26.8274	No	No	Yes	No	No	No	No	148	79	4.57	41.6	6.44	4.41	1.34	0.5	11.3	200	199	21	18	5.29	16	1.92	1.38	1.09	0.53	4.73	12.73	304.13
109	74	Male	AIS	70	160	27.3438	Yes	Yes	No	No	No	No	No	135	70	3.85	38.5	6.52	4.96	0.97	0.34	11.6	164	64.1	19	27	5.38	4	3.95	0.99	2.73	0.96	5.02	13.39	266.03
110	65	Male	AIS	60	167	21.5139	Yes	Yes	Yes	No	No	No	Yes	138	87	4.75	41.4	5.49	3.44	1.49	0.53	11.7	213	76.9	25	25	6.16	8	4.78	1.92	3.02	0.91	3.79	12.88	303.44
111	79	Female	AIS	57	162	21.7193	No	No	Yes	Yes	No	No	No	170	88	4.09	33.7	6.82	4.87	1.52	0.39	13	255	48.3	21	21	6.26	9	5.01	1.55	2.93	1.39	2.86	10.02	135.21
112	47	Male	AIS	71	170	24.5675	Yes	Yes	No	No	No	No	No	173	101	3.45	30.1	8.43	7.72	0.57	0.13	14.1	166	67	8	10	6.76	13	3.51	0.83	2.22	1.18	3.02	11.24	175.23
113	59	Female	AIS	60	160	23.4375	No	No	Yes	No	No	No	No	140	70	4.17	34.8	7.29	4.92	1.66	0.69	12.6	270	27.4	44	34	6.11	17	2.62	1.31	1.31	0.68	3.32	12.93	245.43
114	58	Male	AIS	60	170	20.7612	Yes	No	No	No	No	No	No	132	81	4.82	43.2	14.99	13.42	1.01	0.55	11.5	257	67.1	28	21	7.65	6	4.11	2.93	2.56	0.73	3.12	11.12	167.28
115	87	Female	AIS	50	155	20.8117	No	No	Yes	No	No	No	No	124	79	4.93	32.1	7.12	5.52	0.67	0.4	12.8	173	54.5	12	28	5.12	12	2.83	2.57	1.46	0.57	3.66	14.21	197.28
116	55	Male	AIS	70	170	24.2215	Yes	Yes	No	Yes	No	No	No	143	78	4.56	33.4	7.19	4.87	0.71	0.71	12.3	211	61	25	20	11.2	6	4.28	1.8	2.65	1.06	3.79	12.34	304.55
117	90	Male	AIS	60	171	20.5191	No	No	No	Yes	No	No	Yes	136	76	4.63	39	7.62	4.9	2.6	0.6	13.2	136	147.2	36	34	6.19	8	3.52	1.5	2.18	0.78	3.81	15.29	299.11
118	71	Male	AIS	61	170	21.1073	No	No	Yes	No	No	Yes	No	149	78	5.16	46.3	20.13	18.48	1.9	0.67	13.4	105	120.2	97	100	6.7	20	4.09	0.99	2.72	0.79	4.05	13.28	210.02
119	75	Male	AIS	80	175	26.1224	No	Yes	Yes	No	Yes	Yes	No	147	79	4.68	41.7	9.89	8.47	1.88	0.58	12.9	97	80.2	23	27	5.02	11	4.15	0.65	2.52	1.51	3.57	13.21	280.86
120	69	Male	AIS	65	156	26.7094	No	No	No	No	No	Yes	No	154	84	5.39	21.9	8	6.99	1.46	0.87	10.9	209	50.5	30	38	9.4	11	4.7	0.82	2.78	1.94	4.55	15.26	268.1
121	67	Male	AIS	93	173	31.0735	No	No	Yes	No	No	No	No	147	88	4.18	44.7	5.95	3.99	1.94	0.47	13.7	245	155	9	18	5	4	4.03	2.01	2.68	0.72	3.51	13.92	192.28
122	69	Male	AIS	65	170	22.4913	No	No	Yes	No	No	No	No	139	74	5.14	47.9	6.26	3.26	1.77	0.38	11.8	241	73	19	25	4.62	7	2.88	0.95	1.33	1.26	4.13	15.18	244.92
123	76	Female	AIS	65	158	26.0375	No	No	Yes	Yes	No	Yes	Yes	141	81	5.32	43.4	6.33	4.54	1.27	0.4	15.1	133	90.6	30	20	9.38	8	3.26	0.97	2.12	0.8	4.67	16.23	223.06
124	91	Female	AIS	50	160	19.5312	No	No	Yes	No	No	No	No	132	91	4.07	36.7	6.35	3.67	0.76	0.45	12.9	260	63.5	21	32	7	14	5.14	0.93	3.62	1.28	3.79	15.5	205.5
125	63	Male	AIS	70	170	24.2215	Yes	No	Yes	No	No	No	No	143	79	5.58	45.6	7.57	4.73	1.33	0.44	10.3	255	58.7	20	21	4.46	24	4.72	2.43	2.91	0.89	3.42	11.97	209.27
126	70	Female	AIS	50	150	22.2222	No	No	No	No	No	No	No	145	76	4.93	41.4	8.56	5.64	0.79	0.19	12.1	220	59.7	49	41	7.54	12	4.7	4.11	2.8	0.76	4.52	12.48	206.75
127	79	Female	AIS	60	155	24.974	No	No	No	No	No	No	No	141	78	4.67	42.9	9.19	7.73	1.04	0.35	12.4	176	38.5	21	26	5.91	9	5.61	0.89	3.87	1.46	5.17	13.2	273.88
128	76	Male	AIS	65	165	23.8751	Yes	Yes	Yes	No	Yes	No	No	142	79	4.07	40.1	5.53	4.38	1.18	0.41	11.4	92	52.9	65	61	5.83	14	4.54	0.52	2.99	1.58	4.2	15.79	242.86
129	72	Female	AIS	75	160	29.2969	No	No	Yes	Yes	No	No	No	137	72	4.39	42	5.68	4.53	0.62	0.4	15.1	357	57.9	23	23	9.12	4	5.04	1.42	3.37	0.69	3.63	12.72	256.6
130	52	Male	AIS	75	170	25.9516	Yes	Yes	Yes	No	No	No	No	136	80	5.43	45.3	6.79	5.34	1.55	0.97	12.9	132	61.8	83	49	5.6	2	4.13	1.33	2.8	0.91	5.23	14.27	214.31
131	52	Female	AIS	87	156	35.7495	No	No	Yes	No	No	No	No	147	92	4.96	35.1	8.31	6.78	1.34	0.5	10.3	269	54.2	38	27	8.17	15	3.96	1.78	2.2	1	4.57	14.26	210.93
132	75	Female	AIS	53	155	22.0604	No	No	No	No	No	Yes	No	142	89	3.84	32.4	6.97	5.39	0.97	0.34	12.1	127	64.5	21	35	6.1	11	3.67	0.69	1.55	1.91	4.03	14.08	293.45
133	73	Female	AIS	60	163	22.5827	Yes	No	Yes	No	No	No	Yes	127	71	4.33	41.6	7.74	5.32	1.49	0.53	12.4	264	93	19	20	5.89	12	4.98	4.24	2.89	0.76	3.86	13.05	250.64
134	69	Male	AIS	52.5	162	20.0046	Yes	No	Yes	Yes	No	No	No	128	89	4.86	38.5	7.66	6.07	1.52	0.39	11.4	94	62	18	24	10.18	5	2.93	1.22	1.77	0.69	4.67	15.74	224.78
135	68	Male	AIS	72	168	25.5102	Yes	Yes	Yes	No	No	No	No	127	82	5.29	41.4	6.36	5.47	0.57	0.13	10.3	296	63.5	25	37	9.2	9	4.22	1.91	2.56	1.07	4.86	12.49	216.48
136	72	Male	AIS	80	168	28.3447	Yes	No	Yes	No	Yes	No	No	131	84	3.96	33.7	7.15	3.37	1.66	0.69	12.9	177	105	25	26	5.35	10	3.78	2.01	2.37	0.79	4.24	15.92	303.2
137	83	Male	AIS	85	174	28.075	Yes	Yes	Yes	Yes	No	No	Yes	139	78	4.66	30.1	11.1	7.45	1.01	0.55	12.9	200	93.8	40	24	8.7	9	4.84	2.54	2.97	0.8	3.02	13.21	230.01
138	72	Female	AIS	64	158	25.6369	No	No	Yes	No	No	Yes	No	141	81	3.58	34.8	9.05	4.33	1.43	0.53	10.8	188	67.1	66	64	6.68	13	3.96	0.75	2.38	1.38	4.4	14.77	235.66
139	46	Male	AIS	87	172	29.4078	No	No	Yes	No	No	No	No	147	87	5.44	43.2	8.44	5.62	0.92	0.41	14.3	189	91.7	36	24	4.92	9	4.42	2.22	2.71	0.96	4.71	12.61	182.03
140	70	Male	AIS	72	172	24.3375	No	No	Yes	No	No	No	No	146	79	4.39	34.8	8.11	6.25	1.75	0.45	13.1	142	60	38	25	4.74	8	3.81	1.45	2.49	0.93	4.26	14.23	299.02
141	74	Female	AIS	65	158	26.0375	No	No	Yes	Yes	No	No	Yes	147	75	4.21	43.2	6.44	3.73	2.08	1.08	14.4	166	59	14	16	4.1	14	3.79	1.07	2.37	0.84	3.02	11.03	132.27
142	69	Female	TIA	62	163	23.3355	No	No	No	No	No	No	No	127	76	3.75	32.6	3.02	3.38	1.32	0.21	12.8	110	40.1	34	24	3.69	5	2.61	1.43	2.71	0.86	1.37	7.23	103.85
143	67	Female	TIA	62	160	24.2188	No	No	No	No	No	No	No	132	79	4.59	40	3.46	5.98	0.98	0.38	12.6	135	75.1	41	48	5.2	15	4.65	1.27	2.67	1.28	3.83	11.44	223.18
144	67	Female	TIA	63	162	24.0055	No	No	Yes	No	No	No	No	135	78	3.75	32.6	3.02	3.38	1.32	0.21	11.8	110	40.1	34	22	3.69	3	3.61	1.41	1.71	0.86	1.99	7.78	102.49
145	70	Male	TIA	52	170	17.9931	Yes	Yes	No	No	No	No	No	136	67	3.75	32.6	3.02	4.38	1.32	0.21	11.8	110	40.1	34	22	3.69	8	4.61	1.54	0.91	0.86	2.67	8.17	104.61
146	49	Male	TIA	75	173	25.0593	Yes	No	Yes	No	No	No	No	134	95	4.59	40	3.46	3.98	0.98	0.38	12.6	135	75.1	81	48	5.2	15	4.65	1.27	2.67	1.28	3.17	6.93	177.68
147	72	Female	TIA	50	155	20.8117	No	No	No	Yes	No	No	No	128	77	4.86	43.4	10.32	7.93	1.73	0.62	12.3	250	68.8	35	27	5.99	4	3.49	1.58	2.19	0.82	2.29	10.61	101.52
148	69	Female	TIA	64	163	24.0882	No	No	No	No	No	No	No	121	81	3.75	35.9	5.02	4.38	1.72	0.25	11.3	120	47.1	34	22	5.19	8	4.61	1.73	2.51	0.96	2.97	8.73	103.85
149	64	Female	TIA	66	160	25.7812	Yes	No	No	No	No	No	No	132	80	4.59	40.5	5.46	4.98	1.38	0.42	13.1	145	82.1	51	48	6.73	15	3.65	1.57	2.67	1.28	4.43	10.94	203.18
150	68	Male	TIA	67	162	25.5296	No	Yes	Yes	Yes	No	No	No	135	78	4.25	35.9	6.02	4.38	1.72	0.25	12.3	120	47.1	34	22	5.19	5	3.61	1.73	2.71	0.86	2.59	9.28	152.49
151	70	Male	TIA	61	170	21.1073	Yes	Yes	No	No	No	No	No	136	72	4.25	35.9	5.02	5.38	1.72	0.25	13.3	124	47.1	34	22	5.19	8	3.61	1.53	1.71	0.86	3.27	9.67	104.61
152	49	Male	TIA	79	173	26.3958	Yes	No	Yes	No	No	No	No	131	100	4.79	40.7	5.06	3.98	1.38	0.42	12.1	145	82.1	41	38	5.71	15	4.65	1.57	2.67	1.28	2.77	8.43	177.68
153	72	Female	TIA	54	155	20.8117	No	No	No	Yes	No	No	No	128	82	5.36	46.7	9.32	4.93	1.63	0.66	10.8	260	55.8	35	25	7.49	8	3.49	1.88	2.19	0.82	2.89	12.11	101.52
154	69	Female	TIA	66	163	24.841	No	No	Yes	No	No	No	No	127	82	4.15	35.9	5.02	3.38	1.72	0.25	13.3	120	47.1	34	22	5.19	9	3.61	1.33	2.71	0.86	1.97	8.73	103.85
155	66	Male	TIA	66	160	25.7812	No	Yes	No	Yes	No	No	No	132	84	5.09	37.5	5.46	2.98	1.38	0.42	13.1	135	62.1	41	28	5.73	15	4.65	1.57	2.67	1.18	3.43	11.94	163.18
156	67	Female	TIA	65	162	24.7676	No	No	Yes	No	No	No	No	134	83	4.15	35.9	5.02	2.38	1.72	0.25	11.3	120	47.1	34	22	5.19	8	2.61	1.73	1.71	0.86	2.59	9.28	102.49
157	70	Male	TIA	56	170	19.3772	Yes	Yes	No	No	No	No	No	136	72	4.25	35.9	7.02	4.38	1.62	0.25	14.3	120	47.1	34	22	5.19	9	3.61	1.43	2.51	1.01	3.27	9.67	164.61
158	54	Male	TIA	81	173	27.0641	Yes	No	Yes	No	No	No	No	134	96	5.09	39.6	5.46	2.98	1.38	0.42	11.1	145	82.1	33	28	6.71	15	4.65	1.57	2.67	1.28	3.77	8.43	177.68
159	72	Male	TIA	54	155	20.8117	No	Yes	No	Yes	No	No	No	121	82	5.16	46.7	8.32	5.93	2.13	0.36	12.8	260	75.8	35	25	7.49	7	3.49	1.88	2.19	0.82	2.89	12.11	101.52
160	56	Female	TIA	66	163	24.841	No	No	No	No	No	No	No	127	81	4.25	35.9	5.02	4.38	1.72	0.25	14.3	120	47.1	34	22	5.19	10	3.61	1.63	2.41	1.21	1.97	8.73	133.85
161	67	Male	TIA	80	160	31.25	Yes	No	No	No	No	No	No	132	76	4.79	41.8	5.46	2.98	1.38	0.42	12.1	145	62.1	36	48	5.73	15	4.65	1.57	2.67	1.28	3.43	11.94	213.18
162	74	Male	PE	80	168	28.3447	Yes	No	Yes	No	Yes	No	No	127	84	4.28	36.3	7.15	3.37	1.96	0.29	12.9	177	93	25	22	6.15	10	3.78	2.01	2.37	0.79	1.78	7.32	133.21
163	86	Male	PE	87	174	28.7356	Yes	Yes	Yes	Yes	No	No	Yes	131	78	4.58	31.7	10.1	7.45	1.31	0.35	12.9	200	89.8	40	20	5.5	9	4.84	2.54	2.97	0.8	2.08	8.38	190.01
164	74	Female	PE	64	158	25.6369	No	No	No	No	No	Yes	No	137	81	3.9	36.4	9.05	5.33	1.63	0.33	11.8	188	63.1	46	50	7.48	13	3.96	1.75	2.38	1.38	4.52	14.77	105.66
165	48	Male	PE	81	172	27.3797	No	No	Yes	No	No	No	No	133	87	5.56	44.8	8.44	5.62	1.22	0.41	11.3	189	87.7	36	12	5.72	9	4.42	2.22	2.71	0.96	4.83	12.61	182.03
166	72	Male	PE	72	172	24.3375	No	No	Yes	No	No	No	No	142	79	4.71	36.4	8.11	6.25	2.05	0.45	13.1	142	56	38	17	5.54	8	3.81	1.45	2.49	0.93	1.75	7.25	129.02
167	76	Female	PE	71	158	28.441	No	No	Yes	Yes	No	No	Yes	137	85	4.53	44.8	7.44	3.73	2.38	0.38	14.4	166	55	24	24	4.9	14	3.79	2.07	2.37	0.84	1.61	7.94	132.27
168	70	Male	PE	62	163	23.3355	No	No	No	No	No	No	No	123	76	4.07	34.2	3.02	3.38	1.62	0.21	12.8	110	36.1	34	27	4.49	7	3.61	1.43	2.71	0.86	1.49	7.23	103.85
169	66	Female	PE	62	160	24.2188	No	No	No	No	No	No	No	128	79	4.91	41.6	3.46	5.98	1.28	0.38	12.6	135	71.1	41	53	6	15	4.65	1.27	2.67	1.28	3.95	11.44	133.18
170	66	Female	PE	63	162	24.0055	No	No	Yes	No	No	No	No	131	78	4.07	32.2	4.02	3.38	1.62	0.21	11.8	110	36.1	34	27	4.49	6	2.61	1.23	1.71	0.86	2.11	7.78	132.49
171	69	Male	PE	62	170	21.4533	Yes	Yes	No	No	No	No	No	130	87	4.07	34.2	3.02	3.38	1.62	0.21	11.8	110	43.1	34	27	4.49	6	3.61	1.43	0.91	0.86	2.79	8.17	134.61
172	48	Male	PE	75	173	25.0593	Yes	No	Yes	No	No	No	No	130	95	4.71	43.6	3.46	3.98	1.28	0.38	12.6	135	71.1	31	53	6	15	4.65	1.27	2.67	1.28	3.29	6.93	177.68
173	69	Female	PE	70	155	29.1363	No	No	No	Yes	No	No	No	124	77	5.18	45	10.32	7.93	2.03	0.62	11.3	250	64.8	35	20	6.79	5	3.49	1.58	2.19	0.82	2.41	10.61	101.52
174	68	Female	PE	60	163	22.5827	No	No	No	No	No	No	No	117	76	3.57	34.2	5.02	4.38	1.62	0.21	10.8	110	36.1	34	27	4.49	8	4.61	1.43	2.51	0.96	2.49	7.23	103.85
175	63	Female	PE	72	160	28.125	Yes	No	No	No	No	No	No	128	75	4.41	38.8	3.46	4.98	1.28	0.38	12.6	135	70.1	51	53	6.03	15	3.65	1.27	2.67	1.28	3.95	9.44	103.18
176	67	Male	PE	63	162	24.0055	No	Yes	Yes	Yes	No	No	No	131	73	4.07	34.2	4.02	4.38	1.62	0.21	11.8	112	47.1	34	27	4.49	5	4.61	1.43	2.71	0.86	2.11	7.78	152.49
177	69	Male	PE	57	170	19.7232	No	Yes	No	No	No	No	No	132	67	4.07	34.2	3.02	2.38	1.62	0.21	12.8	114	36.1	34	27	4.49	8	3.61	1.23	1.71	0.86	2.79	8.17	104.61
178	48	Male	PE	75	173	25.0593	Yes	No	Yes	No	No	No	No	127	95	4.41	39	3.06	3.98	1.28	0.38	11.6	135	71.1	31	43	5.01	15	4.65	1.27	2.67	1.28	2.29	6.93	177.68
179	71	Female	PE	50	155	20.8117	No	No	No	Yes	No	No	No	124	77	5.18	42	7.32	1.93	1.53	0.32	10.3	230	54.8	35	25	6.79	4	3.49	1.58	2.19	0.82	2.41	10.61	101.52
180	68	Male	PE	62	163	23.3355	No	No	Yes	No	No	No	No	133	77	3.97	34.2	5.02	3.38	1.62	0.21	11.8	110	49.1	34	27	4.49	6	3.61	1.03	2.71	0.86	1.49	7.23	143.85
181	65	Male	PE	62	160	24.2188	No	Yes	No	Yes	Yes	No	No	128	79	4.91	35.8	3.46	2.98	1.28	0.38	12.6	125	51.1	51	33	5.03	15	4.65	1.27	2.67	1.08	2.95	10.44	163.18
182	66	Female	PE	61	162	23.2434	No	No	Yes	No	No	No	No	130	78	3.97	34.2	3.02	2.38	1.62	0.21	10.8	110	36.1	34	27	4.49	8	3.61	1.43	1.71	0.86	2.11	7.78	132.49
183	68	Male	PE	62	170	21.4533	Yes	Yes	No	No	No	No	Yes	130	67	4.07	34.2	5.02	3.38	1.72	0.21	13.8	110	36.1	34	27	4.49	9	3.61	1.13	2.51	1.01	2.79	8.17	164.61
184	53	Male	PE	77	173	25.7276	No	No	Yes	No	No	No	No	130	91	4.71	37.9	3.46	2.98	1.28	0.38	10.6	135	71.1	43	33	6.01	15	4.65	1.27	2.67	1.28	3.29	6.93	177.68
185	71	Male	PE	50	155	20.8117	No	Yes	No	Yes	No	No	No	117	77	4.98	44	6.32	5.93	1.83	0.32	12.3	223	64.8	35	20	6.79	6	3.49	1.58	2.19	0.82	2.41	10.61	131.52
186	55	Female	PE	62	163	23.3355	No	No	No	No	No	No	No	123	76	4.07	34.2	4.02	2.08	1.52	0.21	12.8	110	36.1	34	30	4.49	10	3.61	1.33	2.41	1.21	1.49	7.23	133.85
187	66	Male	PE	78	160	30.4688	Yes	No	No	No	No	No	No	128	71	4.61	40.1	3.46	2.98	1.28	0.38	11.6	135	51.1	31	53	5.03	15	4.65	1.27	2.67	1.28	2.95	10.44	113.18
188	70	Female	PE	70	160	27.3438	No	No	Yes	Yes	No	No	No	141	73	4.04	38.2	5.73	3.9	1.75	0.31	13.2	102	46.7	29	11	5.54	12	4.07	1.55	2.22	1.45	3.35	13.53	172.27
189	58	Male	PE	68	165	24.977	Yes	No	Yes	No	No	Yes	No	146	102	4.72	41.9	5.89	4.19	1.46	0.45	13.1	211	72.9	32	11	4.88	4	4.84	1.95	3.32	1.13	3.99	13.75	128.38
190	59	Male	PE	77	168	27.2817	No	No	Yes	No	No	No	No	122	79	5.39	45	7.22	5.49	1.71	0.37	11.7	189	46.1	26	17	7.17	9	3.66	1.99	2.49	0.73	4.62	12.45	106.87
191	74	Male	PE	58	160	22.6562	No	Yes	No	No	No	No	No	142	77	4.19	39.5	4.82	3.28	1.44	0.36	13.5	167	62.3	37	20	7.98	7	3.72	1.12	2.44	1.01	4.37	11.47	135.94
192	68	Male	PE	65	160	25.4	No	No	No	No	No	No	No	142	106	4.04	37.8	6.77	3.72	1.53	0.37	12.6	162	48.2	36	22	6.84	10	3.52	1.98	1.93	0.77	2.79	11.26	127.81

## Sheet: SCI,MCI,and LCI
Serial number	Age	Gender (Male and Female)	TOAST typing	NIHSS	Body weight (kg)	Height(cm)	BMI(kg/m2)	Smoking (Yes/No)	Drinking alcohol (Yes/No)	Hypertension	Diabetes	Hyperlipidemia	Atrial fibrillation	Coronary heart disease	Admission systolic blood pressure	Admission diastolic blood pressure	Volume(cm^3)	Volume grouping (Small, Medium, Large)	Red blood cells（10^12/L）	hematocrit	Leukocytes（10^9/L）	Neutrophils（10^9/L）	Lymphocytes	Monocytes	RDW	PLT（10^9/L）	Creatinine(umoL/L)	ALT（u/L）	AST(u/l)	Blood glucose（mmol/L）	Homocysteine（umol/L）	TC, mmol/L	TG, mmol/L	LDL-C, mmol/L	HDL-C, mmol/L	NF-KB p65（ng/ml）	IL-6（pg/ml）	S100A1（pg/ml）
1	56	Male	SAO	2	58	165	21.3	Yes	No	Yes	No	No	No	No	180	110	1	Small	4.4	41.3	5.89	4.19	1.16	0.45	13.1	211	76.9	32	25	4.08	4	4.84	0.95	3.32	1.13	3.87	13.75	208.38
2	57	Male	SAO	1	79	168	28	No	No	No	No	No	No	No	126	79	3.9	Small	5.07	45.4	7.22	5.49	1.41	0.27	11.7	189	50.1	26	21	6.37	3	3.66	1.9	2.49	0.73	4.5	12.45	206.87
3	73	Male	SAO	2	58	160	22.7	No	No	Yes	No	No	No	No	166	57	0.8102	Small	3.87	36.9	4.82	3.28	1.14	0.36	13.5	67	76.3	47	34	7.18	7	3.72	1.12	2.44	1.01	4.25	12.47	205.94
4	66	Female	SAO	2	41	145	19.5	No	No	Yes	Yes	No	No	No	187	86	1.2531	Small	4.58	41.3	6.48	3.97	1.92	0.34	12.2	218	57.3	37	34	7.7	13	5.02	1.66	3.63	0.96	2.84	12.19	187.56
5	60	Female	SAO	1	67	159	26.5	No	No	No	No	Yes	No	No	174	84	1.2595	Small	4.79	43.9	7.83	5.19	2.08	0.42	11.8	147	55.3	27	29	7.14	2	3.17	1.28	1.91	0.84	4.53	11.68	204.66
6	57	Male	SAO	1	58	169	20.3	No	No	No	No	No	No	No	190	100	1.3894	Small	4.57	39.8	4.17	3.1	0.79	0.21	12.5	115	50.6	24	23	5.05	10	3.43	1.57	2.03	0.87	4.45	12.6	219.32
7	69	Male	SAO	2	60	162	22.9	Yes	Yes	Yes	No	No	No	No	103	63	1.2855	Small	4.77	42.2	9.57	6.49	2.28	0.61	13.1	168	46.3	48	46	7.21	10	4.41	2.75	2.25	0.95	3.01	11.04	190.01
8	60	Male	SAO	3	60	160	23.4	No	No	No	No	Yes	No	No	153	85	1.2497	Small	4.9	43.4	5.48	3.58	1.34	0.48	12.2	220	53.7	31	24	4.5	6	2.83	0.86	1.53	0.93	3.62	14.34	200.7
9	51	Male	SAO	3	72	170	24.9	Yes	No	No	No	No	No	No	145	89	1.1722	Small	5.59	45.1	9.35	5.43	2.7	0.75	12.9	251	49.6	62	31	5.27	5	4.76	1.65	3.36	0.86	3.02	11.24	189.01
10	72	Male	SAO	0	70	168	24.8	No	No	No	No	No	No	No	160	91	1.3815	Small	5.29	46.9	4.99	3.21	1.23	0.48	11.9	179	93.6	25	30	4.26	15	4.55	2.54	2.89	0.8	4.33	10.87	208.07
11	69	Female	SAO	1	65	165	23.9	No	No	Yes	No	No	No	No	159	59	1.1189	Small	3.88	34.3	4.28	2.99	1	0.26	13.1	116	55.1	23	37	5.25	13	4.65	1.66	3.12	1.02	3.98	14.69	198.86
12	81	Female	CE	1	60	160	23.4	No	No	No	Yes	No	No	Yes	148	58	1.597	Small	3.78	33.8	5.09	2.98	1.42	0.39	14.4	138	60.4	8	19	5.77	6	4.53	3.33	2.31	0.96	2.98	13.03	194.62
13	63	Female	SAO	4	75	160	29.3	No	No	Yes	No	No	No	No	150	90	1.446	Small	4.99	45.4	7.93	6.73	0.79	0.35	12.7	218	39.8	27	22	5.55	9	4.2	1.19	2.83	1.02	3.6	14.84	209.5
14	52	Male	SAO	1	73	175	23.8	Yes	Yes	No	No	No	No	No	177	102	1.3205	Small	4.92	44.8	8.78	4.97	2.87	0.73	13.4	287	69	14	16	6.25	38	4.48	1.85	3.01	0.79	4.68	12.32	197.2
15	67	Male	SAO	3	63	171	21.5	Yes	No	No	No	No	No	No	154	75	1.2667	Small	4.56	40	5.88	4.45	1.02	0.23	11.9	171	64.7	14	23	4.65	16	4.14	1.35	2.56	0.97	3.86	14.36	208.47
16	81	Male	CE	3	69	175	22.5	Yes	No	No	Yes	No	No	Yes	176	93	1.5293	Small	4.83	44.5	6.94	4.09	2.02	0.72	12.8	201	70	14	19	14.2	14	2.77	0.78	1.24	1.27	3.53	13.31	217.91
17	65	Female	CE	1	67	158	26.8	No	No	No	No	No	No	No	153	99	1.1453	Small	4.46	38.6	4.41	2.04	1.91	0.36	12.1	128	59	29	29	7.1	2	4.35	0.85	2.75	1.37	3.24	10.84	222.38
18	52	Female	CE	2	63	165	23.1	No	No	Yes	Yes	No	Yes	No	144	76	0.9403	Small	3.67	32.1	8.57	5.76	2.32	0.4	11.7	165	63.2	44	25	5.91	3	4.49	1.51	3.03	0.79	3.31	14.66	219.4
19	63	Male	SAO	1	65	170	22.5	No	Yes	No	Yes	No	No	No	135	88	1.2723	Small	4.68	44.6	5.01	3.04	1.38	0.35	12.4	142	55.9	18	26	6.19	11	4.03	1.63	2.61	1.01	3.59	11.05	190.21
20	47	Female	SAO	1	70	162	26.7	No	No	No	Yes	No	No	No	132	91	0.4702	Small	6.94	4.66	42.7	3.17	1.01	0.31	12.8	105	46.2	17	17	16	4	4.87	2.78	3.16	0.81	2.88	13.55	190.79
21	75	Male	SAO	3	60	170	20.8	No	No	Yes	Yes	No	No	Yes	136	82	1.1954	Small	4.35	33.3	6.08	3.53	1.64	0.7	16.1	245	59.6	20	21	8.89	4	4.85	1.21	3.08	0.89	3.13	13.43	186.61
22	65	Male	SAO	3	55	160	21.5	Yes	No	No	No	No	No	No	154	93	1.1268	Small	5.46	47.1	9.52	6.71	1.74	0.75	13.1	110	52.7	35	30	5.83	10	3.56	1.84	2.07	0.9	4.7	15.31	193.94
23	51	Male	SAO	2	80	178	25.2	Yes	No	Yes	No	No	No	No	145	80	1.373	Small	5.66	48.8	8.28	6.32	1.05	0.34	12.1	267	67.3	33	24	4.28	17	3.51	0.89	2.25	0.95	3.58	14.78	208.21
24	67	Male	CE	0	72	160	28.125	Yes	Yes	Yes	No	No	Yes	No	134	87	1.3	Small	69.4	46.6	42.7	3.17	1.01	0.31	12.8	105	46.2	17	17	16	13	4.87	2.78	3.16	0.81	3.93	11.49	197.91
25	61	Female	SAO	1	66	158	26.4	No	No	Yes	No	No	No	No	126	80	1.2878	Small	4.42	39.3	6.16	4.28	1.3	0.45	12.8	240	67	24	29	4.52	6	3.9	1.7	2.34	0.97	4.49	10.61	209.19
26	76	Female	CE	7	70	155	29.1363	No	No	No	No	No	Yes	Yes	154	99	1.44021	Small	3.59	34.3	4.58	2.33	1.77	0.29	18.7	90	52.7	21	27	6.42	2	3.29	1.04	1.46	1.59	3.56	13.78	230.9
27	81	Female	CE	6	75	160	29.2969	No	No	Yes	Yes	No	Yes	No	126	81	2.40652	Small	5	46.7	5.34	3.94	0.9	0.39	12.9	182	71.6	16	24	8.21	6	4.09	1.63	2.69	0.83	2.93	11.01	121.1
28	53	Male	CE	2	88	170	30.4498	No	No	Yes	No	Yes	No	Yes	151	86	0.95746	Small	5.34	52.8	6.46	4.49	1.46	0.4	12.4	119	99	16	16	4.05	10	2.43	1.38	1.1	0.91	3.21	10.09	123.44
29	66	Male	SAO	9	70	165	25.7	Yes	No	Yes	No	Yes	No	No	159	87	2.31243	Small	4.49	43	3.83	2.41	1.02	1.02	12.3	150	67.4	44	32	5.1	8	3.51	1.83	2.06	0.83	4.05	14.69	230.16
30	64	Female	SAO	4	70	160	27.3438	No	No	No	No	No	No	No	114	74	1.003	Small	4.39	41.1	6.04	3.67	1.75	0.45	12.9	133	45.7	34	20	5.7	1	4.14	3.06	2.37	0.82	3.44	11.76	203.03
31	72	Female	LAA	0	65	158	26.0375	No	No	Yes	Yes	No	No	No	150	72	1.12488	Small	4.29	40	6.66	4.17	2.08	2.08	10.9	221	67	41	16	5.6	12	4.23	2.1	2.2	1.2	5.32	16.34	220.14
32	79	Female	LAA	0	53	160	20.7031	No	No	No	No	No	No	No	165	88	1.22092	Small	4.2	37.8	6.18	3.58	2.14	0.41	13.7	153	51.5	42	37	4.53	7	2.97	0.7	1.49	1.03	4.21	13.93	204.24
33	72	Male	LAA	3	65	170	22.4913	Yes	Yes	No	Yes	No	No	No	135	72	2.61682	Small	2.88	27.2	5.34	2.5	1.49	0.61	15.1	193	66	3	13	6.44	8	3.35	1.01	2.13	0.81	5.17	14.2	235.77
34	58	Male	LAA	7	70	174	23.1206	Yes	Yes	Yes	No	No	No	Yes	134	92	2.405	Small	4.71	42.5	4.01	2.33	1.33	0.28	12.9	147	78	40	27	6.17	32	2.83	1.8	1.28	1.04	3.54	15.8	226.32
35	71	Male	LAA	2	65	165	23.8751	No	No	No	Yes	No	No	No	144	66	1.85268	Small	3.56	33.4	6.7	3.56	2.38	0.43	12.9	175	52.8	20	19	3.65	5	3.59	1.81	2.35	0.8	5.21	15.8	245.61
36	66	Female	LAA	3	45	155	18.7305	No	No	Yes	Yes	No	Yes	No	169	69	1.345	Small	2.5	21.9	8.27	5.37	1.9	0.67	13.3	243	52.4	44	45	4.77	3	4.23	1.38	2.98	0.77	4.85	12.21	200.12
37	52	Male	LAA	2	70	165	25.7117	Yes	Yes	Yes	No	No	No	No	141	93	3.87121	Small	4.75	43.4	9.67	6.99	1.94	0.47	12.6	244	78	35	32	5.06	6	4.52	2.03	2.36	1.06	4.36	15.98	233.51
38	79	Male	LAA	2	55	170	19.0311	Yes	Yes	Yes	No	No	Yes	No	155	77	3.4116	Small	4.86	45.6	5.77	4.04	1.27	0.4	15.8	218	87.4	22	24	3.97	14	3.82	1.22	2.13	1.3	4.37	13.91	207.86
39	86	Male	LAA	2	65	160	25.3906	Yes	Yes	Yes	No	No	No	No	179	93	0.7587	Small	4.7	42.9	5.53	3.64	1.33	0.44	12.3	166	99.8	28	34	8.13	6	3.68	3.29	2.3	0.59	4.65	14.71	202.85
40	59	Male	LAA	2	70	172	23.6614	No	No	Yes	No	No	No	No	148	78	3.0145	Small	3.78	32.4	17.3	10.47	5.55	0.97	14.6	317	69	8	9	4.17	12	4.87	1.92	2.94	1.45	3.73	15.84	225.42
41	79	Female	LAA	10	57	162	21.7193	No	No	Yes	Yes	No	Yes	No	170	88	2.0336	Small	4.09	33.7	6.82	4.87	1.52	0.39	13	255	48.3	21	21	6.26	9	5.01	1.55	2.93	1.39	2.86	10.02	135.21
42	47	Male	LAA	3	71	170	24.5675	Yes	Yes	No	No	No	No	No	173	101	1.5992	Small	3.45	30.1	8.43	7.72	0.57	0.13	14.1	166	67	8	10	6.76	13	3.51	0.83	2.22	1.18	3.02	11.24	175.23
43	58	Male	LAA	2	60	170	20.7612	Yes	No	No	No	No	No	No	132	81	2.1997	Small	4.82	43.2	14.99	13.42	1.01	0.55	11.5	257	67.1	28	21	7.65	6	4.11	2.93	2.56	0.73	3.12	11.12	167.28
44	87	Female	LAA	4	50	155	20.8117	No	No	Yes	No	No	No	No	124	79	1.365	Small	4.93	32.1	7.12	5.52	0.67	0.4	12.8	173	54.5	12	28	5.12	12	2.83	2.57	1.46	0.57	3.66	14.21	197.28
45	67	Male	LAA	3	93	173	31.0735	No	No	Yes	No	No	No	No	147	88	1.7466	Small	4.18	44.7	5.95	3.99	1.94	0.47	13.7	245	155	9	18	5	4	4.03	2.01	2.68	0.72	3.51	13.92	192.28
46	91	Female	LAA	5	50	160	19.5312	No	No	Yes	No	No	Yes	No	132	91	0.86066	Small	4.07	36.7	6.35	3.67	0.76	0.45	12.9	260	63.5	21	32	7	14	5.14	0.93	3.62	1.28	3.79	15.5	205.5
47	63	Male	LAA	5	70	170	24.2215	Yes	No	Yes	No	No	No	No	143	79	1.5552	Small	5.58	45.6	7.57	4.73	1.33	0.44	10.3	255	58.7	20	21	4.46	24	4.72	2.43	2.91	0.89	3.42	11.97	209.27
48	74	Female	LAA	2	65	158	26.0375	No	No	Yes	Yes	No	No	Yes	147	75	1.3582	Small	4.21	43.2	6.44	3.73	2.08	1.08	14.4	166	59	14	16	4.1	14	3.79	1.07	2.37	0.84	3.02	11.03	132.27
49	68	Female	SAO	4	75	160	29.3	No	No	Yes	No	No	Yes	No	155	73	0.7528	Small	3.82	36.6	5.73	3.9	1.45	0.31	13.2	102	50.7	29	25	4.74	12	4.07	1.55	2.22	1.35	3.23	13.53	272.27
50	56	Female	SAO	4	55	165	20.2	No	No	Yes	Yes	No	No	No	163	86	1	Small	4.17	36.5	7.51	4.55	2.55	0.35	12.5	212	35.4	21	18	3.66	11	5.16	1.12	0.89	0.63	2.89	11.73	239.62
51	54	Male	SAO	2	75	173	24.1	No	No	Yes	Yes	No	No	No	140	100	0.996	Small	5.13	42.7	5.28	4.14	0.78	0.34	11.6	176	50	7	11	11.01	4	5.87	0.87	4.13	1.39	4.36	12.93	270.45
52	77	Male	SAO	4	58	174	19.2	Yes	No	No	No	No	No	No	115	69	1.493	Small	3.9	38.3	10.98	9.22	1.09	0.59	13.3	97	83.4	22	26	3.99	11	3.83	0.95	2.22	1.18	3.58	12.56	266.55
53	65	Male	SAO	1	76	160	29.7	Yes	No	Yes	Yes	No	No	No	146	101	1.1729	Small	4.6	41.2	6.66	3.25	2.92	0.36	13.5	135	84	27	19	8.41	22	3.5	2.22	2.09	0.82	3.53	11.28	260.73
54	66	Male	SAO	1	65	165	23.9	No	No	Yes	No	No	No	No	172	87	0.6006	Small	4.37	42.4	5.16	2.97	1.48	0.36	12.4	169	93	12	19	4.3	20	3.15	0.98	1.85	1.01	3.88	14.78	241.66
55	83	Male	SAO	3	80	175	26.1	Yes	No	No	No	No	No	No	140	69	1.5634	Small	4.12	37.6	7.25	4.47	1.89	0.65	12.4	222	70.8	14	17	5.55	14	3.79	1.97	2.43	0.73	4.55	12.39	184.78
56	72	Male	SAO	4	72	170	24.9	No	No	Yes	No	No	No	No	161	87	1.411	Small	4.14	38.4	4.4	2.16	1.64	0.5	12.8	176	70.7	15	22	5	11	3.84	1.55	2.45	0.93	4.74	14.3	238.34
57	80	Male	SAO	3	75	172	25.4	Yes	Yes	Yes	No	No	No	No	107	60	0.8712	Small	4.67	44.9	7.88	4.15	2.88	0.6	14.4	278	101.6	23	28	5.4	29	4.12	1.48	2.52	1.13	2.98	10.95	274.91
58	63	Male	Others	3	65	170	22.5	Yes	Yes	No	No	No	No	No	140	86	0.8017	Small	4.5	41.8	5.6	3.3	1.61	0.27	12.7	190	47.3	17	24	5.04	4	4.42	2.03	2.65	1.22	4	14.13	233.88
59	69	Male	SAO	2	75	165	27.5	No	No	Yes	No	No	No	No	140	90	1.2288	Small	5.05	43	6.21	3.97	1.48	0.63	12.2	191	78.3	25	33	4.76	13	4.62	2.49	2.94	0.65	3.33	13.39	244.75
60	70	Female	CE	2	65	158	26	No	No	Yes	No	No	No	No	167	69	1.2182	Small	4.4	37.3	8.4	7.13	0.97	0.26	13	340	45.8	52	44	6.22	9	6.08	1.6	4.43	1.13	4.04	12.64	258.48
61	64	Male	SAO	4	75	170	26	Yes	Yes	Yes	No	No	No	No	137	87	1.5622	Small	5.62	48.4	14.62	3.27	1.25	0.75	13.1	161	81.7	20	30	3.96	16	4.14	3.49	2.16	0.66	3.52	14.05	247.73
62	85	Female	SAO	1	40	160	15.6	No	No	Yes	No	No	No	No	160	70	0.7762	Small	3.9	35.7	5.61	2.64	1.42	0.38	13.1	268	59	29	27	3.94	4	4.85	2.21	3.08	0.89	4.12	12.87	235.65
63	65	Male	SAO	0	80	170	27.7	Yes	No	Yes	No	No	Yes	No	160	82	2.06	Small	5.45	45.5	5.89	3.95	1.44	0.41	12.7	188	76.2	58	34	4.95	5	3.11	0.9	1.86	1.02	4.7	14.51	274.45
64	73	Male	Others	3	58	164	21.6	Yes	No	Yes	No	No	No	No	135	90	4.0264	Small	5.06	43.5	13.61	10.71	2.38	0.49	12.1	242	77.5	38	45	4.56	31	4.12	1.69	2.53	0.78	3.67	15.45	281.44
65	81	Male	CE	7	60	172	20.2812	No	No	Yes	Yes	No	No	No	165	94	0.73027	Small	4.13	37.9	3.91	2.55	0.9	0.38	11	77	85	30	34	5.22	9	2.89	0.87	1.69	0.99	3.34	12.16	262.6
66	69	Female	CE	6	65	160	25.3906	No	No	Yes	No	No	Yes	No	154	100	0.85011	Small	4.48	41.5	6.85	5.9	1.42	0.21	11.8	276	56.7	20	26	6.57	14	6.35	1.54	4.33	1.36	4.46	11.89	268.1
67	56	Female	LAA	4	60	160	23.4375	No	No	Yes	No	No	No	No	156	97	4.44469	Small	4.53	39.8	13.92	12.47	0.93	0.49	11.8	248	45.4	39	35	4.46	18	4.43	1.34	2.49	1.56	3.59	13.87	279.14
68	83	Female	LAA	3	65	158	26.0375	No	No	Yes	Yes	No	No	Yes	201	88	0.879	Small	3.92	35.4	6.76	5.16	1.19	0.28	10.3	287	93.4	28	20	6.47	3	5.99	2.62	3.96	1.01	4.03	13.02	251.79
69	73	Male	LAA	1	65	169	22.7583	No	No	Yes	No	No	No	No	145	63	1.245	Small	4.45	40.2	6.81	5.13	1.18	0.44	12.1	234	74	25	22	5.7	14	4.6	2.35	2.88	1.01	4.07	16.16	279.54
70	78	Male	LAA	2	52	163	19.5717	No	No	Yes	Yes	No	No	Yes	152	78	4.002	Small	4.2	41	5.42	4.36	0.65	0.35	12.4	134	58.5	29	29	5.2	9	2.6	0.47	1.07	1.49	5.27	12.14	302.49
71	58	Female	LAA	2	60	160	23.4375	No	No	Yes	No	No	No	No	164	98	3.977	Small	4.65	42.9	5.96	3.18	2.23	0.45	11.4	283	59.9	18	27	4.37	9	4.68	0.87	3.03	1.4	3.7	15.43	256.65
72	82	Male	LAA	3	60	175	19.5918	No	No	Yes	No	No	No	No	168	67	4.009	Small	5.23	46.3	5.59	4.46	0.71	0.71	19.8	139	60.2	35	22	4.87	24	4.31	1.35	3.02	0.87	4.64	15.6	289.35
73	60	Male	LAA	3	50	163	18.8189	Yes	Yes	Yes	Yes	No	No	No	148	82	3.5	Small	4.97	44.7	8.05	5.22	1.88	0.58	12.1	252	54.1	70	45	5.74	10	4.68	0.86	3.36	0.86	3.94	14.99	263.47
74	71	Male	LAA	0	64	170	22.1453	Yes	Yes	Yes	No	No	No	No	140	80	2.798	Small	4.34	41.4	4.38	3.24	0.76	0.345	12.4	149	65.9	24	25	4.76	5	3.09	1.12	1.67	1.16	4.54	15.07	283.6
75	75	Male	LAA	3	75	170	25.9516	Yes	Yes	Yes	Yes	No	No	No	155	89	2.631	Small	4.86	42	5.63	4.09	1.04	0.35	10.4	199	75	105	84	10.63	9	4.27	2.9	2.59	0.95	3.39	12.1	302.56
76	58	Male	LAA	0	85	178	26.8274	No	No	Yes	No	No	No	No	148	79	3.7123	Small	4.57	41.6	6.44	4.41	1.34	0.5	11.3	200	199	21	18	5.29	16	1.92	1.38	1.09	0.53	4.73	12.73	304.13
77	74	Male	LAA	1	70	160	27.3438	Yes	Yes	No	No	No	No	No	135	70	2.8129	Small	3.85	38.5	6.52	4.96	0.97	0.34	11.6	164	64.1	19	27	5.38	4	3.95	0.99	2.73	0.96	5.02	13.39	266.03
78	69	Male	LAA	9	65	170	22.4913	No	No	Yes	No	No	No	No	139	74	1.66786	Small	5.14	47.9	6.26	3.26	1.77	0.38	11.8	241	73	19	25	4.62	7	2.88	0.95	1.33	1.26	4.13	15.18	244.92
79	66	Female	SAO	3	65	160	25.4	No	No	No	No	No	No	No	176	106	5.192	Medium	3.72	36.2	6.77	5.72	0.75	0.27	11.6	162	49.2	32	27	6.04	10	3.52	1.98	1.93	0.77	4.67	13.26	227.81
80	72	Male	SAO	5	60	168	21.3	Yes	No	Yes	No	No	No	No	176	97	9.807	Medium	5.09	43.6	6.18	3.97	1.62	0.46	12.4	292	54.2	25	23	3.99	23	4.21	2.37	2.91	0.61	3.82	11.94	197.91
81	55	Male	SAO	2	70	165	25.7	No	No	Yes	No	No	No	No	172	107	5.1906	Medium	5.2	45	5.29	3.22	1.61	0.39	11.8	153	47.4	46	29	10.37	2	3.6	2.48	1.17	0.54	3.05	11.44	205.12
82	74	Male	SAO	4	65	170	22.5	Yes	No	No	No	No	No	Yes	156	96	8.1738	Medium	4.34	41.5	5.27	4.18	0.71	0.35	12.9	100	80.5	29	24	5.66	9	4.2	2.07	2.37	1.18	3.15	13.96	180.92
83	68	Male	LAA	4	50	165	18.4	Yes	Yes	Yes	No	No	No	No	171	112	5.5846	Medium	5.1	44.7	9.58	6.41	2.11	0.87	13.3	205	65	11	17	5.19	11	5.1	1.62	3.68	1.02	4.29	10.33	215.59
84	57	Male	SAO	1	67	165	24.6	Yes	Yes	No	No	No	No	No	123	70	4.2515	Medium	5.04	46.6	4.55	2.37	1.52	0.42	12.4	169	61.4	29	30	4.29	6	4.33	4.23	1.84	0.89	3.32	11.56	230.11
85	75	Female	LAA	4	55	158	22	No	No	Yes	Yes	No	No	No	176	95	4.53622	Medium	4.29	38.9	8.8	5.22	2.64	0.79	12.9	263	92.5	10	19	6.75	17	3.46	3.73	1.79	0.72	3.75	11.64	230.22
86	49	Male	SAO	2	63	169	22.1	Yes	No	No	No	No	No	No	110	70	5.1361	Medium	4.19	41.4	9.14	5.36	3.01	0.51	11.4	203	74	19	20	5.57	17	4.18	3.88	1.91	0.66	3.92	13.59	217.74
87	66	Female	SAO	0	66	153	28.2	No	No	Yes	Yes	No	No	No	130	80	6.5729	Medium	4.14	37.2	8.25	5.83	1.75	0.42	12.4	254	63	9	17	6.81	4	4.09	2.2	2.75	0.65	3.23	11.84	181.12
88	66	Female	SAO	4	62	159	24.5	No	No	Yes	Yes	No	No	No	131	76	5.8103	Medium	3.71	35.3	5.78	3.35	1.9	0.39	12.3	180	63.8	17	22	7.22	15	3.65	1.13	2.12	1.17	4.55	12.78	192.33
89	47	Male	LAA	1	75	172	25.4	Yes	Yes	Yes	No	Yes	No	No	158	111	7.3052	Medium	5.3	43.7	8.17	6.03	1.31	0.65	12.7	256	61.9	63	35	5.7	9	5.25	2.5	3.61	1.03	4.86	13.49	223.91
90	72	Female	CE	1	60	154	25.2994	No	No	Yes	No	No	Yes	No	132	84	8	Medium	6.94	46.6	42.7	3.17	2.01	0.31	12.8	105	46.2	17	17	16	12	4.87	2.78	3.16	0.81	3.52	12.01	231.21
91	61	Male	CE	2	77	169	26.9598	Yes	No	No	No	No	Yes	No	133	85	7	Medium	4.08	37.3	6.04	4.08	1.26	0.63	13.3	173	88.3	38	27	6.48	7	2.36	1.1	1.1	0.87	3.05	11.92	241.01
92	72	Female	SAO	3	66	164	24.539	No	No	Yes	No	Yes	No	No	129	78	7.003	Medium	4.18	36.9	5.55	3.3	1.6	0.38	12.3	139	66.5	24	25	5.4	10	4.42	1.42	2.87	1.03	4.35	12.56	202.41
93	67	Male	SAO	0	77	170	26.6436	Yes	No	No	No	No	No	Yes	134	75	8	Medium	3.59	34.3	4.58	2.33	1.77	0.29	18.7	90	52.7	21	27	6.41	2	3.29	1.04	1.46	1.59	3.89	12.08	181.63
94	64	Female	SAO	0	62	161	23.9188	Yes	No	Yes	No	No	No	No	127	79	8	Medium	4.18	36.9	5.55	3.3	1.6	0.38	12.3	139	66.5	24	25	5.4	10	4.42	1.42	2.87	1.03	3.23	11.84	181.12
95	69	Male	CE	0	65	168	23.03	No	No	Yes	No	No	Yes	No	155	76	9.02143	Medium	4.18	36.9	5.55	3.3	1.6	0.38	12.3	139	66.5	24	25	5.4	10	4.42	1.42	2.87	1.03	5.01	11.24	200.63
96	66	Male	LAA	2	41	148	18.718	No	No	Yes	No	No	No	No	145	76	6.632	Medium	3.59	34	6.98	5	1.43	0.53	13.2	112	47.6	18	24	5.8	16	5.05	1.06	3.34	1.16	4.12	11.7	218.89
97	81	Female	LAA	2	53	155	22.0604	No	No	Yes	No	No	No	Yes	162	82	5.532	Medium	3.52	32.1	7.81	5.49	1.73	1.73	10.3	160	79.5	24	31	5.27	5	4.38	1.5	2.89	1.03	3.6	15.89	209.83
98	72	Female	LAA	14	45	155	18.7305	No	No	Yes	Yes	No	No	No	158	81	6.6013	Medium	4.02	35.1	6.46	5.33	0.62	0.4	12.2	123	39.9	19	41	12.22	4	4.37	1.03	2.56	1.56	3.76	15.78	212.74
99	83	Male	LAA	3	85	174	28.075	Yes	Yes	Yes	Yes	No	No	Yes	139	78	7	Medium	4.66	30.1	11.1	7.45	1.01	0.55	12.9	200	93.8	40	24	8.7	9	4.84	2.54	2.97	0.8	3.02	13.21	230.01
100	78	Male	SAO	2	63	165	23.1	No	No	No	No	No	No	No	153	97	5.1593	Medium	4.53	40.4	6.09	4.26	1.16	0.58	13.3	171	45.2	28	27	4.48	14	3.71	1.16	2.09	1.15	3.19	11.95	273.36
101	87	Female	SAO	2	60	155	25	No	No	Yes	No	No	No	No	183	84	5.2657	Medium	4.37	38.9	5.4	3.79	1.23	0.29	13.2	233	75	21	26	6.34	19	3.44	1.51	2.14	0.89	3.25	11.14	252.3
102	57	Female	CE	3	60	165	22	No	No	Yes	Yes	No	No	No	160	81	5.4706	Medium	4.26	36.3	5.36	3.38	1.64	0.23	12.6	218	41.4	20	16	7.82	12	4.2	1.28	1.8	0.8	3.05	13.28	184.67
103	15	Male	CE	11	85	178	26.8	No	No	No	Yes	No	No	No	109	54	5.819	Medium	5	40.1	4.95	3.39	0.55	0.67	13.2	253	69.4	49	27	4.9	38	2.8	0.73	1.62	0.99	3.84	13.68	275.71
104	86	Male	LAA	16	90	178	28.4	No	No	Yes	No	No	Yes	No	130	66	5.057	Medium	4.56	41.1	7.19	4.91	1.5	0.65	13.2	210	98.7	30	20	7.6	8	3.21	0.63	2.14	0.69	4.42	13.05	235.77
105	64	Female	SAO	6	80	165	29.4	No	No	Yes	Yes	No	No	No	137	78	6.1695	Medium	4.3	39.4	4.8	3.33	1.16	0.26	12.9	193	42	72	60	9.78	7	4.91	1.25	2.39	1.01	4.91	13.49	253.51
106	70	Female	CE	2	61	163	22.9591	No	No	No	No	No	Yes	No	156	92	7	Medium	4.3	39.4	4.8	3.33	1.16	0.26	12.9	193	42	72	60	9.78	7	4.91	3.25	2.39	1.01	4.68	12.79	245.95
107	62	Male	LAA	6	75	174	24.7721	No	Yes	Yes	No	No	No	No	152	98	6.15205	Medium	4.93	47.9	6.01	3.61	1.46	0.87	12.9	117	87	38	40	3.74	9	2.88	0.91	1.42	1.21	3.94	15.58	286.39
108	73	Female	LAA	1	55	162	20.9572	No	No	No	No	Yes	No	No	165	78	5.003	Medium	4.06	36.7	6.82	4.51	1.77	0.38	13.2	182	74.4	23	22	4.25	7	5.76	2.68	3.39	1.42	4.82	13.39	267.13
109	59	Female	LAA	11	60	160	23.4375	No	No	Yes	No	No	No	No	140	70	8.7964	Medium	4.17	34.8	7.29	4.92	1.66	0.69	12.6	270	27.4	44	34	6.11	17	2.62	1.31	1.31	0.68	3.32	12.93	245.43
110	75	Male	LAA	19	80	175	26.1224	No	Yes	Yes	No	No	Yes	No	147	79	9.0015	Medium	4.68	41.7	9.89	8.47	1.88	0.58	12.9	97	80.2	23	27	5.02	11	4.15	0.65	2.52	1.51	3.57	13.21	280.86
111	46	Male	SAO	2	87	172	29.4	No	No	Yes	No	No	No	No	152	87	20.71	Large	5.44	47.7	8.44	5.62	1.93	0.72	13.4	189	91.7	36	24	4.92	9	4.42	2.22	2.71	0.96	4.71	12.61	182.03
112	71	Male	SAO	28	61	170	21.1073	No	No	Yes	No	No	No	No	149	78	15.3758	Large	5.16	46.3	20.13	18.48	1.9	0.67	13.4	105	120.2	97	100	6.7	20	4.09	0.99	2.72	0.79	4.05	13.28	210.02
113	76	Female	LAA	33	65	158	26.0375	No	No	Yes	Yes	No	No	Yes	141	81	15.0945	Large	5.32	43.4	6.33	4.54	1.27	0.4	15.1	133	90.6	30	20	9.38	8	3.26	0.97	2.12	0.8	4.67	16.23	223.06
114	70	Female	SAO	11	50	150	22.2222	No	No	No	No	No	No	No	145	76	22.8392	Large	4.93	41.4	8.56	5.64	0.79	0.19	12.1	220	59.7	49	41	7.54	12	4.7	4.11	2.8	0.76	4.52	12.48	206.75
115	72	Female	SAO	15	75	160	29.2969	No	No	Yes	Yes	No	No	No	137	72	16.6674	Large	4.39	42	5.68	4.53	0.62	0.4	15.1	357	57.9	23	23	9.12	4	5.04	1.42	3.37	0.69	3.63	12.72	256.6
116	52	Male	SAO	12	75	170	25.9516	Yes	Yes	Yes	No	No	No	No	136	80	16.1508	Large	5.43	45.3	6.79	5.34	1.55	0.97	12.9	132	61.8	83	49	5.6	2	4.13	1.33	2.8	0.91	5.23	14.27	214.31
117	52	Female	LAA	8	87	156	35.7495	No	No	Yes	No	No	No	No	147	92	10.6226	Large	4.96	35.1	8.31	6.78	1.34	0.5	10.3	269	54.2	38	27	8.17	15	3.96	1.78	2.2	1	4.57	14.26	210.93
118	69	Male	LAA	22	52.5	162	20.0046	Yes	No	Yes	Yes	No	No	No	128	89	16.6343	Large	4.86	38.5	7.66	6.07	1.52	0.39	11.4	94	62	18	24	10.18	5	2.93	1.22	1.77	0.69	4.67	15.74	224.78
119	68	Male	SAO	7	72	168	25.5102	Yes	Yes	Yes	No	No	No	No	127	82	11.3017	Large	5.29	41.4	6.36	5.47	0.57	0.13	10.3	296	63.5	25	37	9.2	9	4.22	1.91	2.56	1.07	4.86	12.49	216.48
120	72	Female	CE	37	64	158	25.6369	No	No	Yes	No	No	Yes	No	141	81	19.0357	Large	3.58	34.8	9.05	4.33	1.43	0.53	10.8	188	67.1	66	64	6.68	13	3.96	0.75	2.38	1.38	4.4	14.77	235.66
121	46	Male	LAA	2	87	172	29.4078	No	No	Yes	No	No	No	No	147	87	19.0748	Large	5.44	43.2	8.44	5.62	0.92	0.41	14.3	189	91.7	36	24	4.92	9	4.42	2.22	2.71	0.96	4.71	12.61	182.03
122	88	Male	CE	2	75	170	26	No	No	Yes	Yes	No	No	Yes	130	55	14.2877	Large	4.08	37.3	6.04	4.08	1.26	0.63	13.3	173	88.3	38	27	6.48	7	2.36	1.1	1.1	0.87	4.86	15.3	286.41
123	72	Female	Others	37	64	158	25.6	No	No	Yes	No	No	Yes	Yes	157	84	18.4852	Large	3.58	34.9	9.05	4.33	1.91	0.39	14.4	188	67.1	66	64	7.2	10	3.96	0.75	2.38	1.38	4.4	14.77	235.66
124	72	Female	LAA	4	65	156	26.7094	No	No	Yes	No	No	No	No	145	94	12	Large	5.45	45.5	5.89	3.95	1.44	0.41	12.7	188	76.2	58	34	4.95	5	3.11	0.9	1.86	1.02	3.95	13	275.16
125	69	Female	CE	0	64	163	24.0882	No	No	No	No	No	Yes	No	145	91	12.352	Large	3.58	34.9	9.05	4.33	1.91	0.39	14.4	188	67.1	66	64	7.2	9	3.96	0.75	2.38	1.38	4.67	11.21	265.47
126	63	Female	SAO	6	55	150	24.4444	No	No	No	No	No	No	No	167	110	23.3571	Large	4.23	36.7	8.67	6.97	1.13	0.33	12	120	48.1	38	40	5.27	11	6.84	1.83	4.51	1.57	3.92	15.31	260.37
127	77	Male	SAO	11	60	170	20.7612	Yes	Yes	No	No	No	No	No	146	60	16.7672	Large	3.27	34.2	5.25	3.87	0.92	0.41	13.4	67	46	34	26	5.11	22	2.64	0.85	1.35	0.94	4.79	12.74	237.2
128	80	Male	LAA	13	70	172	23.6614	No	Yes	Yes	No	No	No	No	170	85	17.7754	Large	4.24	39	4.36	3.24	0.67	0.4	12.9	167	73.3	37	34	4.72	12	2.38	0.68	1.11	1.06	4.59	12.79	282.72
129	40	Male	LAA	3	89	172	30.0838	Yes	No	Yes	No	No	No	No	117	77	21.268	Large	4.8	41.7	6.46	3.1	2.6	0.6	14.3	202	89.3	33	25	4.98	17	5	2.36	3.42	0.64	3.8	15.92	267.54
130	71	Female	SAO	22	50	157	20.2848	No	No	No	No	No	No	No	182	89	24.766	Large	4.57	40.1	8.01	7.01	0.79	0.19	12.7	164	58.3	30	29	7.18	13	5.32	0.92	3.06	1.88	4.78	13.57	266.49
131	51	Male	LAA	18	80	175	26.1224	Yes	Yes	Yes	No	No	No	No	161	100	12	Large	4.89	45.3	7.94	6.33	1.18	0.41	13	175	53.6	27	32	5.36	7	5.9	1.23	3.96	1.51	5.13	15.92	303.78
132	65	Male	LAA	3	60	167	21.5139	Yes	Yes	Yes	No	No	No	Yes	138	87	10.3872	Large	4.75	41.4	5.49	3.44	1.49	0.53	11.7	213	76.9	25	25	6.16	8	4.78	1.92	3.02	0.91	3.79	12.88	303.44
133	55	Male	SAO	5	70	170	24.2215	Yes	Yes	No	Yes	No	No	No	143	78	14.36	Large	4.56	33.4	7.19	4.87	0.71	0.71	12.3	211	61	25	20	11.2	6	4.28	1.8	2.65	1.06	3.79	12.34	304.55
134	90	Male	LAA	4	60	171	20.5191	No	No	No	Yes	No	No	Yes	136	76	10	Large	4.63	39	7.62	4.9	2.6	0.6	13.2	136	147.2	36	34	6.19	8	3.52	1.5	2.18	0.78	3.81	15.29	299.11
135	69	Male	CE	20	65	156	26.7094	No	No	No	No	No	Yes	No	154	84	10.0973	Large	5.39	21.9	8	6.99	1.46	0.87	10.9	209	50.5	30	38	9.4	11	4.7	0.82	2.78	1.94	4.55	15.26	268.1
136	79	Female	SAO	7	60	155	24.974	No	No	No	No	No	No	No	141	78	14.2399	Large	4.67	42.9	9.19	7.73	1.04	0.35	12.4	176	38.5	21	26	5.91	9	5.61	0.89	3.87	1.46	5.17	13.2	273.88
137	76	Male	SAO	25	65	165	23.8751	Yes	Yes	Yes	No	Yes	No	No	142	79	13.5114	Large	4.07	40.1	5.53	4.38	1.18	0.41	11.4	92	52.9	65	61	5.83	14	4.54	0.52	2.99	1.58	4.2	15.79	242.86
138	75	Female	SAO	13	53	155	22.0604	No	No	No	No	No	No	No	142	89	12.4741	Large	3.84	32.4	6.97	5.39	0.97	0.34	12.1	127	64.5	21	35	6.1	11	3.67	0.69	1.55	1.91	4.03	14.08	293.45
139	73	Female	LAA	3	60	163	22.5827	Yes	No	Yes	Yes	No	No	Yes	127	71	18.6835	Large	4.33	41.6	7.74	5.32	1.49	0.53	12.4	264	93	19	20	5.89	12	4.98	4.24	2.89	0.76	3.86	13.05	250.64
140	72	Male	SAO	29	80	168	28.3447	Yes	No	Yes	No	Yes	No	No	131	84	14.7856	Large	3.96	33.7	7.15	3.37	1.66	0.69	12.9	177	105	25	26	5.35	10	3.78	2.01	2.37	0.79	4.24	15.92	303.2
141	70	Male	SAO	20	72	172	24.3375	No	No	Yes	No	No	No	No	146	79	17.4933	Large	4.39	34.8	8.11	6.25	1.75	0.45	13.1	142	60	38	25	4.74	8	3.81	1.45	2.49	0.93	4.26	14.23	299.02
